# Supplementary material for: Flavonoid Biosynthesis Genes Putatively Identified in the Aromatic Plant Polygonum minus via Expressed Sequences Tag (EST) Analysis
Source: Int J Mol Sci. 2012 Feb 28;13(3):2692–706. doi: 10.3390/ijms13032692 (PMC3317681; doi:10.3390/ijms13032692)

# Supplementary Information

## 1. Flavonoid Associated Gene in *P.minus*

**Table S1.** Of 48 unique transcripts related to secondary metabolite, 11 unique transcripts flavonoid associated gene was found in *P.minus*

| Gene                                    | EC Number  | Similarity | E-value | Species                     | EST                             |
|-----------------------------------------|------------|------------|---------|-----------------------------|---------------------------------|
| <b>Flavonoid</b>                        |            |            |         |                             |                                 |
| naringenin-chalcone synthase            | 2.3.1.74   | 96         | 2e-80   | <i>Fallopia multiflora</i>  | 321541_P61_D12_M13F-pUC-40cn260 |
| leucoanthocyanidin dioxygenase          | 1.14.11.19 | 95         | 1e-04   | <i>Phytolacca americana</i> | cn202                           |
|                                         |            | 95         | 7e-52   | <i>Fagopyrum esculentum</i> | cn203                           |
|                                         |            |            |         |                             |                                 |
| shikimate O-hydroxycinnamoyltransferase | 2.3.1.133  | 79         | 8e-56   | <i>Ricinus communis</i>     | R008.D07.ab1                    |
| flavanone 3-dioxygenase                 | 1.14.11.9  | 75         | 2e-26   | <i>Camelia sinensis</i>     | R005.C12.ab1                    |
| leucoanthocyanidin reductase            | 1.17.1.3   | 74         | 4e-74   | <i>Ricinus communis</i>     | R003.E05.ab1                    |
| caffeoyl-CoA O-methyltransferase        | 2.1.1.104  | 87         | 1e-38   | <i>Arabidopsis thaliana</i> | R009.E03.ab1                    |
| flavonol synthase                       | 1.14.11.23 | 75         | 2e-26   | <i>Camelia sinensis</i>     | R005.C12.ab1                    |
|                                         |            |            |         | <i>Arabidopsis thaliana</i> | S013.F07                        |
|                                         |            |            |         | <i>Carthamus tinctorius</i> | S018.D09                        |
| leucoanthocyanidin dioxygenase          | 1.14.11.19 | 90         | 3e-24   | <i>Phytolacca americana</i> | S001.A10                        |

**Table S2.** Primers for genes of interest and two housekeeping genes with the length of the amplified product.

| Genes                                 | Accession | EST                | Primer sequences                                         | Length | Size amplicon (bp) |
|---------------------------------------|-----------|--------------------|----------------------------------------------------------|--------|--------------------|
| Flavonoid Genes                       |           |                    |                                                          |        |                    |
| Flavonol synthase (FLS)               | JG705819  | R005.C12           | <i>pm</i> FLS fwd : 5'<br>AGGAGTCTGGTGAACAAGGAG 3'       | 22     | 128                |
|                                       |           |                    | <i>pm</i> FLS rev : 5'<br>TTGGTTGCGTATGCTGAAGG 3'        | 21     |                    |
| Naringenin chalcone synthase (CHS)    | JG745304  | cn260              | <i>pm</i> CHS fwd : 5'<br>ACTTGCCCTCGTCGCCTTGA 3'        | 19     | 116                |
|                                       |           |                    | <i>pm</i> CHS rev : 5'<br>CTCCCTCTTCTGGATTGC 3'          | 18     |                    |
| Leucoanthocyanidin dioxygenase (LDOX) | JG745247  | cn203              | <i>pm</i> LDOX fwd : 5'<br>TGCTGAGGATGGTGATGGTGTC 3'     | 22     | 143                |
|                                       |           |                    | <i>pm</i> LDOX rev : 5'<br>ACGGACGTGAGTGCCTTGAC 3'       | 20     |                    |
| Internal control                      |           |                    |                                                          |        |                    |
| β-actin                               | JG744126  | 292178_P55_F5_M13F | <i>pm</i> B-actin fwd : 5'<br>AGCCGCCACTGAGCACAAT 3'     | 19     | 131                |
|                                       |           |                    | <i>pm</i> B-actin rev : 5'<br>GGTCCTCTTCCAGACTTCCATGA 3' | 23     |                    |
| Tubulin                               |           |                    | <i>pm</i> TUB fwd: 5'<br>TACCAGCCACCAACCGTAGTCC 3'       | 22     | 150                |
|                                       |           |                    | <i>pm</i> TUB rev: 5'<br>CCAACCTCCTCGTAGTCTTTCTCAA 3'    | 25     |                    |

## 2. Gene Ontology Anotation

**Figure S1.** Distribution of unigenes with GO terms associated with biological processes, molecular functions and cellular components. The grouped *P. minus* EST sequences were assigned GO terms according to Blast2Go software. (a) Biological process; (b) Cellular component; (c) Molecular function.

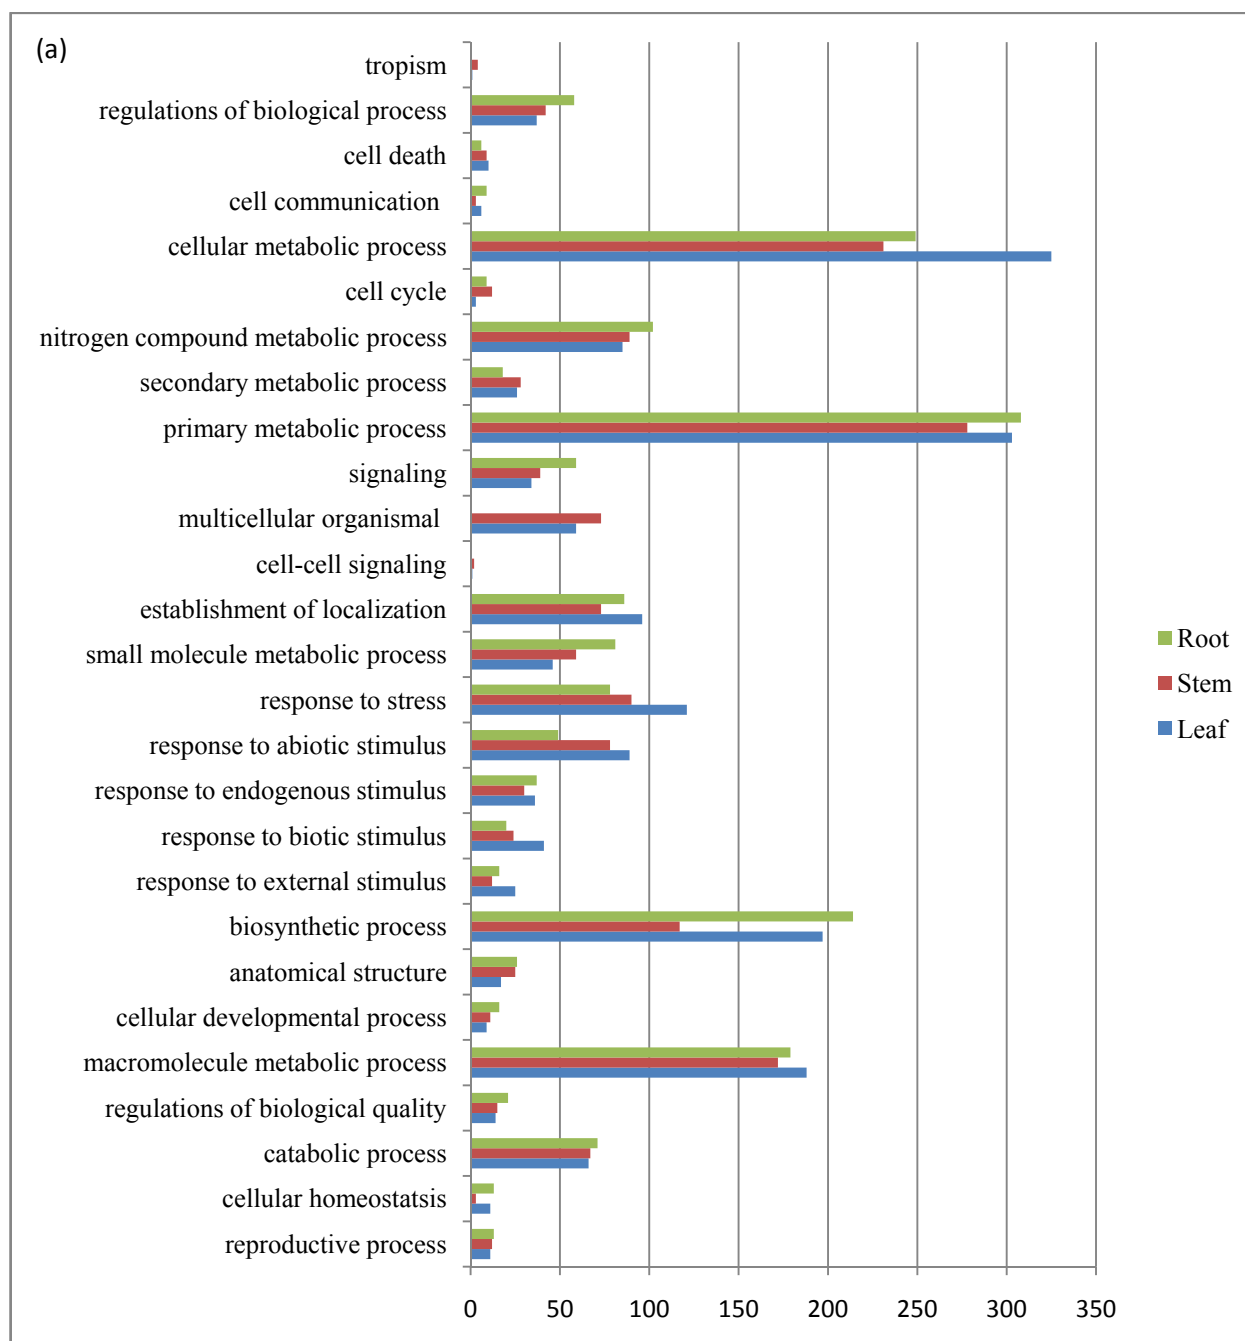

Figure S1. Cont.

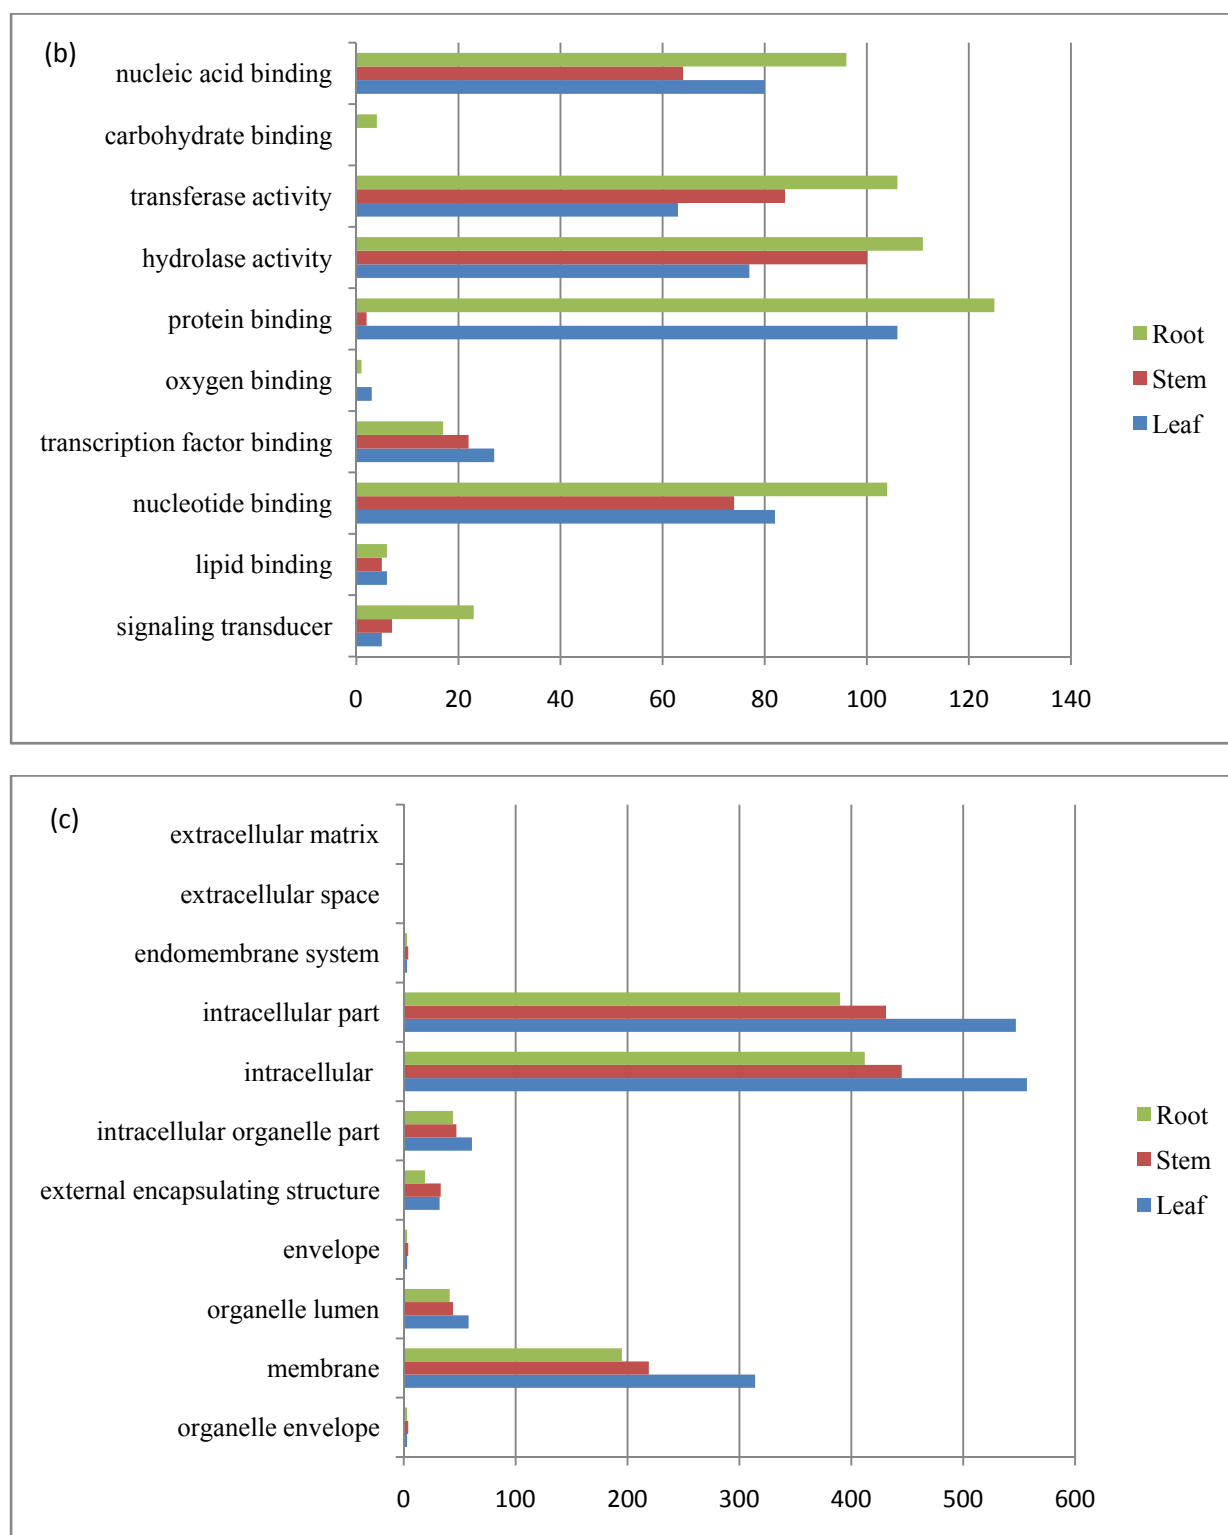

**Figure S2.** Flavonoid Biosynthesis Pathway in *P.minus*. This pathway was constructed with integrated of EST data (Blue) and metabolomic data (Red).

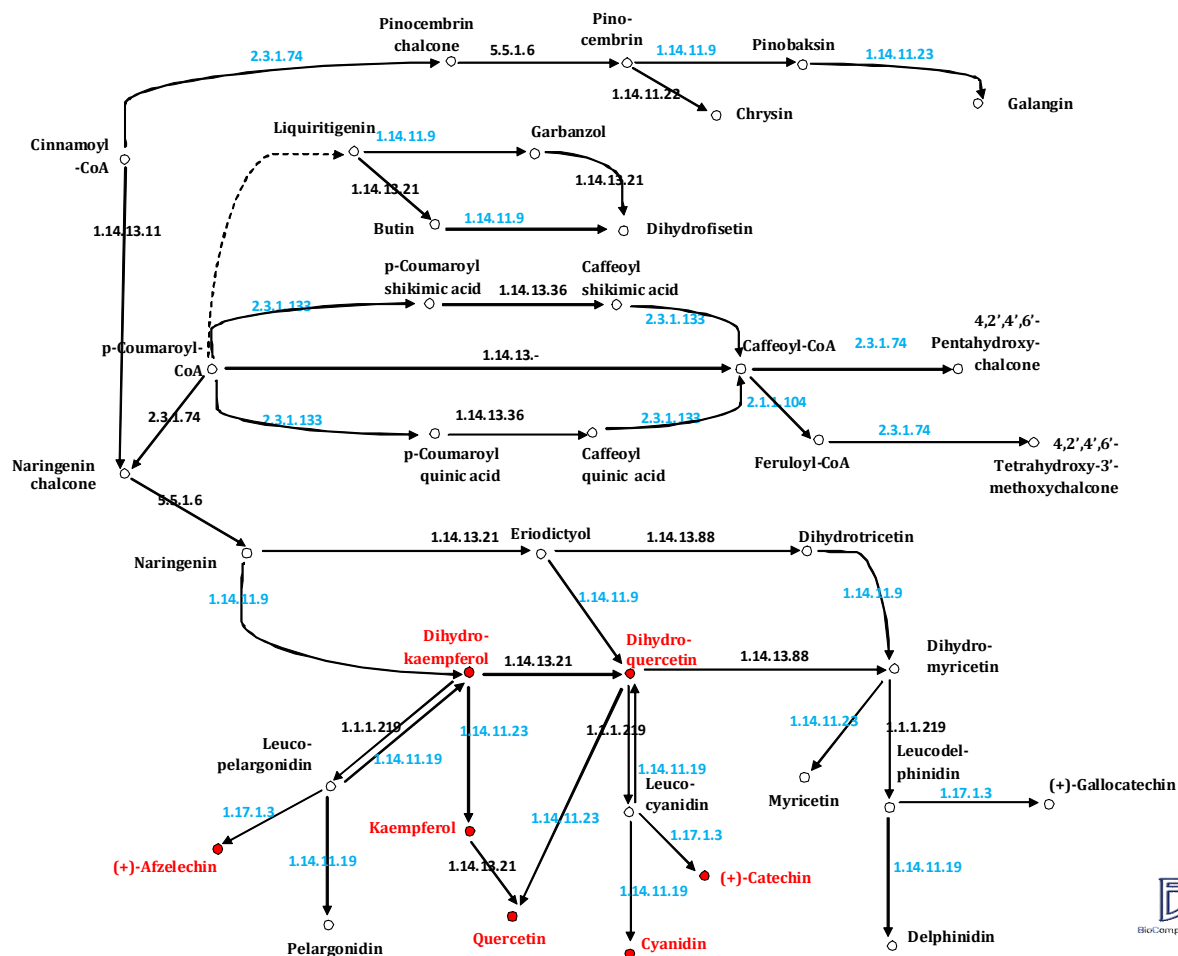

Supplement: Supplementary file 1 [file ijms-13-02692-s001.pdf]
